# Supplementary material for: Humidity and temperature driven transformations in ferroelectric quinuclidine-based chlorocobaltate(ii) complex salt: bulk and thin films with preferred orientation
Source: Royal Society of Chemistry journal article supplement (doi:10.1039/d4tc01150c), 2024-01-01
Supplement: d4tc01150c1.pdf [file d4tc01150c1.pdf]

## **Electronic supplementary information**

**for**

### **Humidity and temperature driven transformations in ferroelectric quinuclidine-based chlorocobaltate(II) complex salt: bulk and thin films with preferred orientation**

**Mia Mesić, Marko Dunatov, Andreas Puškarić, Zoran Štefanić and Lidija Androš Dubraja\***

Ruđer Bošković Institute, Bijenička cesta 54, 10000 Zagreb, Croatia

## Contents

|                                                                                                                                                                                                                                                                                                                 |   |
|-----------------------------------------------------------------------------------------------------------------------------------------------------------------------------------------------------------------------------------------------------------------------------------------------------------------|---|
| <b>Table S1.</b> Crystallographic data and structure refinement details from single-crystal XRD analysis for [H-(O)ABCO] <sub>2</sub> (CoCl <sub>4</sub> )·H <sub>2</sub> O ( <b>I</b> ) and [H-(O)ABCO] <sub>2</sub> (CoCl <sub>4</sub> ) ( <b>II</b> ) .....                                                  | 3 |
| <b>Table S2.</b> Crystallographic data and structure refinement details from PXRD analysis for [H-(O)ABCO] <sub>2</sub> (CoCl <sub>4</sub> )·H <sub>2</sub> O ( <b>I</b> ), [H-(O)ABCO] <sub>2</sub> (CoCl <sub>4</sub> ) ( <b>II</b> ) and [H-(O)ABCO] <sub>2</sub> (CoCl <sub>4</sub> ) ( <b>III</b> ). ..... | 4 |
| <b>Figure S1.</b> PXRD pattern and profile fitting results for [H-(O)ABCO] <sub>2</sub> (CoCl <sub>4</sub> )·H <sub>2</sub> O ( <b>I</b> ) at 298 K. ....                                                                                                                                                       | 5 |
| <b>Figure S2.</b> PXRD pattern and profile fitting results for [H-(O)ABCO] <sub>2</sub> (CoCl <sub>4</sub> ) ( <b>II</b> ) at 298 K. ....                                                                                                                                                                       | 5 |
| <b>Figure S3.</b> PXRD pattern and profile fitting results for [H-(O)ABCO] <sub>2</sub> (CoCl <sub>4</sub> ) ( <b>III</b> ) at 393 K. ....                                                                                                                                                                      | 5 |
| <b>Figure S4.</b> PXRD patterns following the structural transformation from the hydrate phase <b>I</b> to the anhydrous phase <b>II</b> and the recovered hydrate phase <b>I</b> . A simulated diffractograms from the single-crystal XRD data are given for comparison.....                                   | 6 |
| <b>Figure S5.</b> PXRD patterns showing thermal stability of the anhydrous phase <b>II</b> . A simulated diffractogram from the single-crystal XRD data is given for comparison. ....                                                                                                                           | 6 |

### Abbreviations:

---

|                          |   |                                                                          |                 |
|--------------------------|---|--------------------------------------------------------------------------|-----------------|
| <b>I</b>                 | = | [H-(O)ABCO] <sub>2</sub> (CoCl <sub>4</sub> )·H <sub>2</sub> O           | Hydrate phase   |
| <b>II</b>                | = | [H-(O)ABCO] <sub>2</sub> (CoCl <sub>4</sub> )                            | Anhydrous phase |
| [H-(O)ABCO] <sup>+</sup> | = | 1-azabicyclo[2.2.2]octan-3-one cation, C <sub>7</sub> H <sub>12</sub> NO |                 |

**Table S1.** Crystallographic data and structure refinement details from single-crystal XRD analysis for [H-(O)ABCO]<sub>2</sub>(CoCl<sub>4</sub>)·H<sub>2</sub>O (I) and [H-(O)ABCO]<sub>2</sub>(CoCl<sub>4</sub>) (II)

| Compound                                                                 | I                                                                                | II-LT                                                                            | II                                                                               |
|--------------------------------------------------------------------------|----------------------------------------------------------------------------------|----------------------------------------------------------------------------------|----------------------------------------------------------------------------------|
| Temperature/K                                                            | 293                                                                              | 100                                                                              | 293                                                                              |
| Crystal colour, habit                                                    | Blue, prism                                                                      | Blue, prism                                                                      | Blue, prism                                                                      |
| Empirical formula                                                        | C <sub>14</sub> H <sub>26</sub> Cl <sub>4</sub> Co N <sub>2</sub> O <sub>3</sub> | C <sub>14</sub> H <sub>24</sub> Cl <sub>4</sub> Co N <sub>2</sub> O <sub>2</sub> | C <sub>14</sub> H <sub>24</sub> Cl <sub>4</sub> Co N <sub>2</sub> O <sub>2</sub> |
| <i>M<sub>r</sub></i> /g mol <sup>-1</sup>                                | 471.10                                                                           | 453.08                                                                           | 453.08                                                                           |
| Crystal system                                                           | orthorhombic                                                                     | monoclinic                                                                       | monoclinic                                                                       |
| Space group                                                              | <i>Pc2<sub>1</sub>n</i>                                                          | <i>P2<sub>1</sub></i>                                                            | <i>P2<sub>1</sub></i>                                                            |
| <i>a</i> /Å                                                              | 14.2651(2)                                                                       | 6.93160(10)                                                                      | 6.5717(5)                                                                        |
| <i>b</i> /Å                                                              | 9.0392(2)                                                                        | 12.3079(2)                                                                       | 13.5034(7)                                                                       |
| <i>c</i> /Å                                                              | 15.7057(3)                                                                       | 11.5102(2)                                                                       | 21.0441(12)                                                                      |
| <i>α</i> /°                                                              | 90                                                                               | 90                                                                               | 90                                                                               |
| <i>β</i> /°                                                              | 90                                                                               | 105.751(2)                                                                       | 90.322(6)                                                                        |
| <i>γ</i> /°                                                              | 90                                                                               | 90                                                                               | 90                                                                               |
| <i>V</i> /Å <sup>3</sup>                                                 | 2025.17(7)                                                                       | 945.10(3)                                                                        | 1867.4(2)                                                                        |
| <i>Z</i>                                                                 | 4                                                                                | 2                                                                                | 2                                                                                |
| <i>ρ</i> <sub>calcd</sub> /g cm <sup>-3</sup>                            | 1.545                                                                            | 1.592                                                                            | 1.612                                                                            |
| <i>μ</i> /mm <sup>-1</sup>                                               | 11.632                                                                           | 12.398                                                                           | 12.550                                                                           |
| <i>F</i> (000)                                                           | 972                                                                              | 466                                                                              |                                                                                  |
| <i>θ</i> range/°                                                         | 4.187–88.168                                                                     | 3.990 - 79.671                                                                   | 932                                                                              |
| Measured reflections                                                     | 9146                                                                             | 6761                                                                             | 6711                                                                             |
| Independent reflections                                                  | 3031                                                                             | 3138                                                                             | 3920                                                                             |
| Observed reflections                                                     | 2917                                                                             | 2988                                                                             | 2454                                                                             |
| No. of parameters, restraints                                            | 225, 6                                                                           | 209, 1                                                                           | 340, 1                                                                           |
| <i>R</i> <sub>int</sub>                                                  | 0.0347                                                                           | 0.0286                                                                           | 0.3964*                                                                          |
| <i>R</i> , w <i>R</i> [ <i>I</i> > 2σ( <i>I</i> )]                       | 0.0427, 0.1118                                                                   | 0.0351, 0.0959                                                                   | 0.1884, 0.4327                                                                   |
| <i>R</i> , w <i>R</i> [all data]                                         | 0.0437, 0.1126                                                                   | 0.0369, 0.0972                                                                   | 0.2494, 0.5132                                                                   |
| Goodness of fit                                                          | 1.064                                                                            | 1.051                                                                            | 1.969                                                                            |
| Δ <i>ρ</i> <sub>max</sub> , Δ <i>ρ</i> <sub>min</sub> /e Å <sup>-3</sup> | 0.647, -0.368                                                                    | 0.467, -0.315                                                                    |                                                                                  |
| Flack parameter                                                          | 0.010(5)                                                                         | -0.030(4)                                                                        | -0.01(2)                                                                         |

\* High *R*<sub>int</sub> value is due to a twinned crystal in with very high proportion of completely overlapped reflections, which makes it impossible to obtain a better structural model.

**Table S2.** Crystallographic data and structure refinement details from PXRD analysis for [H-(O)ABCO]<sub>2</sub>(CoCl<sub>4</sub>)·H<sub>2</sub>O (I), [H-(O)ABCO]<sub>2</sub>(CoCl<sub>4</sub>) (II) and [H-(O)ABCO]<sub>2</sub>(CoCl<sub>4</sub>) (III).

| Compound                                  | I                                                                               | II                                                                              | III                                                                             |
|-------------------------------------------|---------------------------------------------------------------------------------|---------------------------------------------------------------------------------|---------------------------------------------------------------------------------|
| Temperature/K                             | 298                                                                             | 298                                                                             | 393                                                                             |
| Empirical formula                         | C <sub>14</sub> H <sub>26</sub> Cl <sub>4</sub> CoN <sub>2</sub> O <sub>3</sub> | C <sub>14</sub> H <sub>24</sub> Cl <sub>4</sub> CoN <sub>2</sub> O <sub>2</sub> | C <sub>14</sub> H <sub>24</sub> Cl <sub>4</sub> CoN <sub>2</sub> O <sub>2</sub> |
| <i>M<sub>r</sub></i> /g mol <sup>-1</sup> | 471.10                                                                          | 453.08                                                                          | 453.08                                                                          |
| Crystal system                            | Orthorhombic                                                                    | Monoclinic                                                                      | Monoclinic                                                                      |
| Space group                               | <i>Pc2<sub>1</sub>n</i>                                                         | <i>P2<sub>1</sub></i>                                                           | <i>Pc</i>                                                                       |
| <i>a</i> /Å                               | 14.2541                                                                         | 6.5826                                                                          | 18.5195                                                                         |
| <i>b</i> /Å                               | 9.0386                                                                          | 13.5080                                                                         | 12.2279                                                                         |
| <i>c</i> /Å                               | 15.6952                                                                         | 21.0568                                                                         | 18.4294                                                                         |
| <i>α</i> /°                               | 90                                                                              | 90                                                                              | 90                                                                              |
| <i>β</i> /°                               | 90                                                                              | 90.468                                                                          | 120.508                                                                         |
| <i>γ</i> /°                               | 90                                                                              | 90                                                                              | 90                                                                              |
| <i>V</i> /Å <sup>3</sup>                  | 2022.143                                                                        | 1872.288                                                                        | 3595.663                                                                        |
| <i>Z</i>                                  | 4                                                                               | 2                                                                               | 2                                                                               |
| Step size/°                               | 0.013                                                                           | 0.013                                                                           | 0.013                                                                           |
| 2θ range/°                                | 4–50                                                                            | 4–50                                                                            | 8.5–50                                                                          |
| <i>R<sub>p</sub></i>                      | 0.336                                                                           | 0.761                                                                           | 1.93                                                                            |
| <i>R<sub>wp</sub></i>                     | 0.426                                                                           | 0.970                                                                           | 2.43                                                                            |
| <i>R<sub>exp</sub></i>                    | 0.380                                                                           | 0.736                                                                           | 2.16                                                                            |
| Goodness of fit                           | 1.12                                                                            | 1.32                                                                            | 1.13                                                                            |
| Background                                | Chebyshev polynomial of 6 <sup>th</sup> order                                   |                                                                                 | Chebyshev polynomial of 7 <sup>th</sup>                                         |

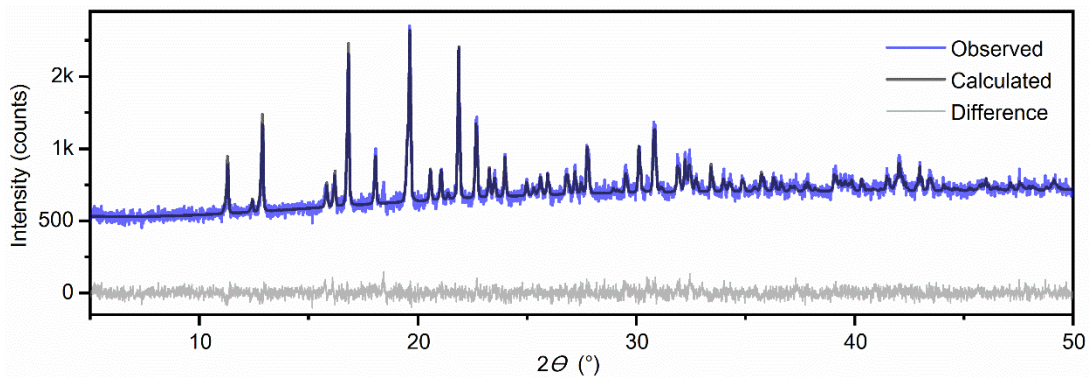

Figure S1. PXRD pattern and profile fitting results for  $[\text{H}-(\text{O})\text{ABCO}]_2(\text{CoCl}_4) \cdot \text{H}_2\text{O}$  (I) at 298 K.

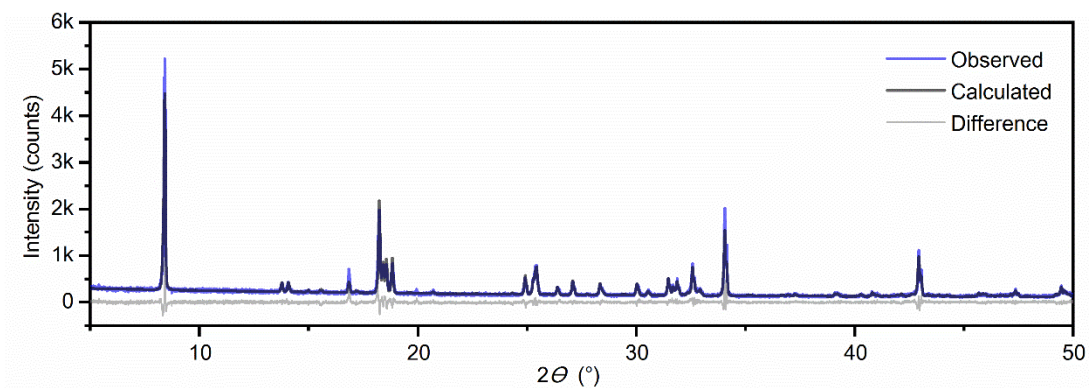

Figure S2. PXRD pattern and profile fitting results for  $[\text{H}-(\text{O})\text{ABCO}]_2(\text{CoCl}_4)$  (II) at 298 K.

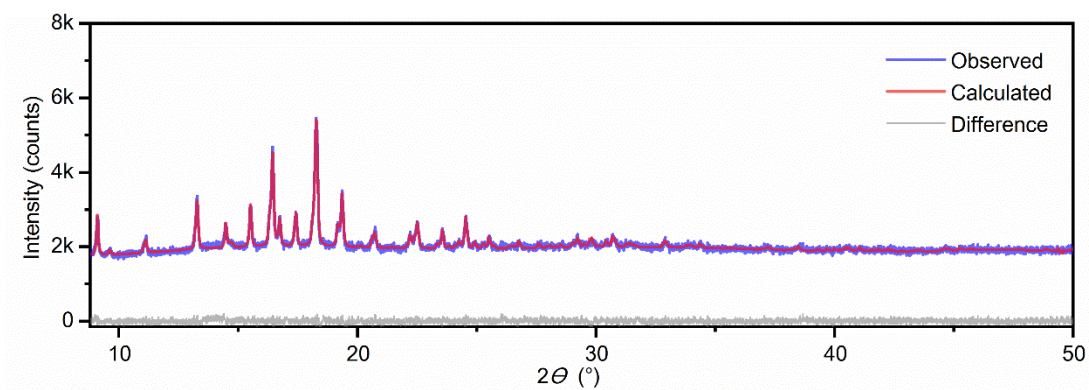

Figure S3. PXRD pattern and profile fitting results for  $[\text{H}-(\text{O})\text{ABCO}]_2(\text{CoCl}_4)$  (III) at 393 K.

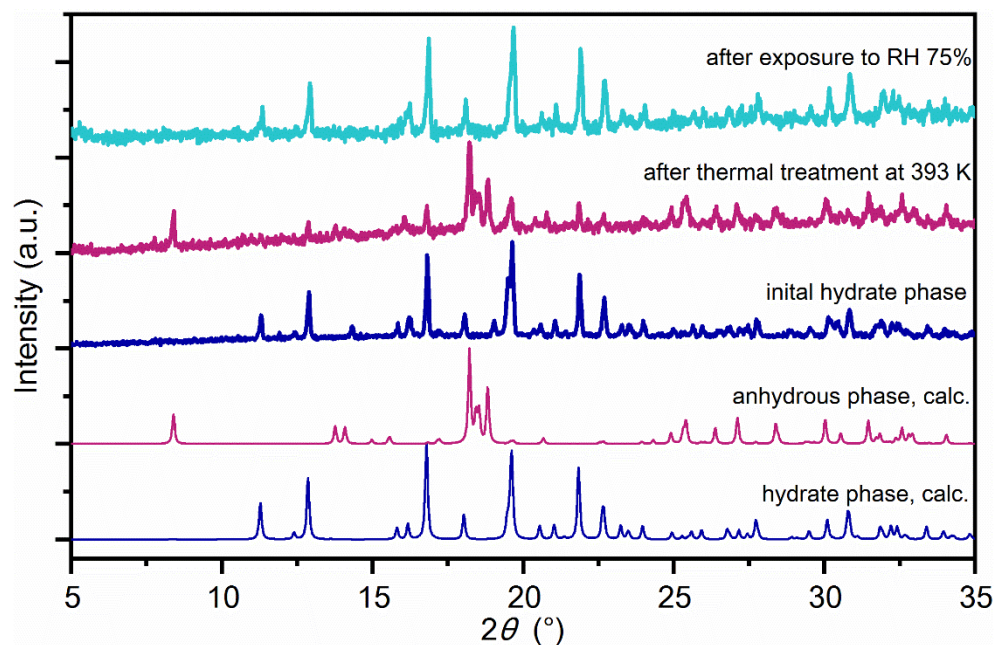

**Figure S4.** PXRD patterns following the structural transformation from the hydrate phase I to the anhydrous phase II and the recovered hydrate phase I. A simulated diffractograms from the single-crystal XRD data are given for comparison.

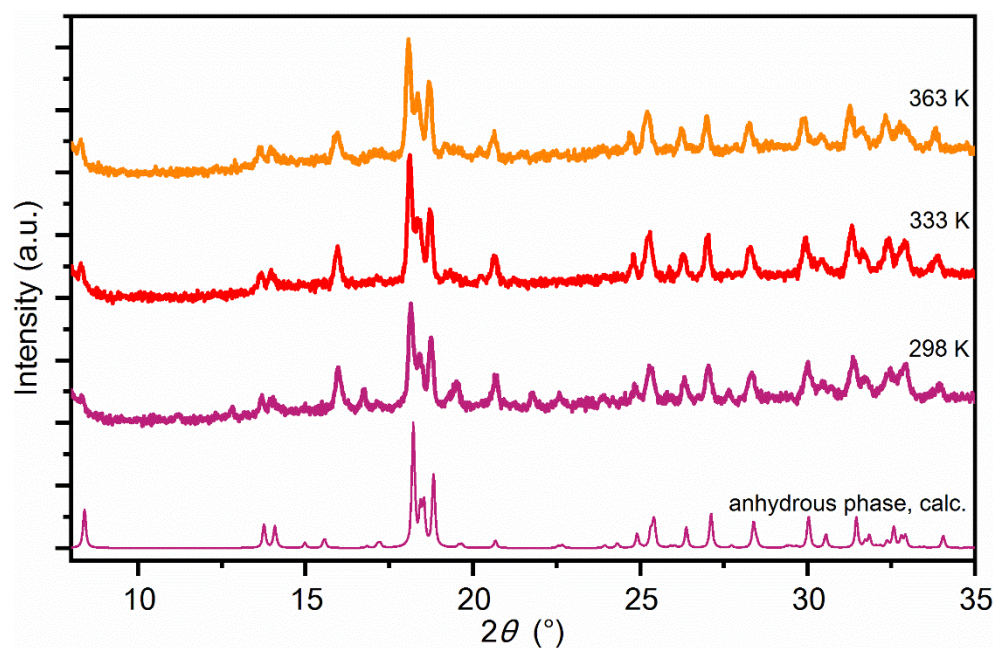

**Figure S5.** PXRD patterns showing thermal stability of the anhydrous phase II. A simulated diffractogram from the single-crystal XRD data is given for comparison.
